# Supplementary material for: Influence of TCF7L2 gene variants on the therapeutic response to the dipeptidylpeptidase-4 inhibitor linagliptin
Source: Springer Nature journal article supplement (doi:10.1007/s00125-014-3276-y), 2014-06-06
Supplement: MOESM1 [file 8092332]

**ESM Table 1** Detailed information and results of each specific trial in comparison to the whole study population

|                                                            | NCT00641043                              | NCT00621140                                           | NCT00601250                                       | NCT00602472                                         | Pooled        |
|------------------------------------------------------------|------------------------------------------|-------------------------------------------------------|---------------------------------------------------|-----------------------------------------------------|---------------|
| Brief description                                          | Initial combination<br>with pioglitazone | Efficacy of<br>monotherapy vs.<br>placebo at 24 weeks | Efficacy as add-on to<br>metformin vs.<br>placebo | Efficacy as add-on to<br>metformin/SU vs<br>placebo |               |
| Randomization                                              | 1:2                                      | 1:2                                                   | 1:3                                               | 1:3                                                 |               |
| Total number of patients<br>in the study, <i>N</i> (%)     | 380 (100.00)                             | 496 (100.00)                                          | 688 (100.00)                                      | 1040 (100.00)                                       | 2604 (100.00) |
| Placebo                                                    | 128 (33.68)                              | 163 (32.86)                                           | 175 (25.44)                                       | 262 (25.19)                                         | 728 (28.96)   |
| Treated                                                    | 252 (66.32)                              | 333 (67.14)                                           | 513 (74.56)                                       | 778 (74.81)                                         | 1876 (72.04)  |
| Total number of<br>genotyped patients, <i>n</i> (%)        | 133 (35.00)                              | 179 (36.09)                                           | 210 (30.52)                                       | 439 (42.21)                                         | 961 (36.90)   |
| Placebo                                                    | 50 (39.06)                               | 62 (38.04)                                            | 54 (30.86)                                        | 102 (38.93)                                         | 268 (36.81)   |
| Treated                                                    | 83 (32.94)                               | 117 (35.14)                                           | 156 (30.41)                                       | 337 (43.32)                                         | 693 (36.94)   |
| Genotype distribution in<br>treated patients, <i>n</i> (%) |                                          |                                                       |                                                   |                                                     |               |
| CC                                                         | 34 (40.96)                               | 51 (43.59)                                            | 78 (50.00)                                        | 193 (57.27)                                         | 356 (51.37)   |
| CT                                                         | 40 (48.19)                               | 54 (46.15)                                            | 64 (41.03)                                        | 106 (31.45)                                         | 264 (38.10)   |
| TT                                                         | 9 (10.84)                                | 12 (10.26)                                            | 14 (8.97)                                         | 38 (11.28)                                          | 73 (10.53)    |
| Frequency of minor<br>allele T, %                          | 34.94                                    | 33.33                                                 | 29.49                                             | 27.00                                               | 29.58         |

|                                                                                                                                  |                               |                               |                               |                               |                                |
|----------------------------------------------------------------------------------------------------------------------------------|-------------------------------|-------------------------------|-------------------------------|-------------------------------|--------------------------------|
| Baseline HbA <sub>1c</sub> , mean %<br>(SD)                                                                                      |                               |                               |                               |                               |                                |
| Placebo                                                                                                                          | 8.70 (0.96)                   | 8.05 (0.97)                   | 7.99 (0.91)                   | 8.23 (0.81)                   | 8.23 (0.93)                    |
| Treated by genotype                                                                                                              |                               |                               |                               |                               |                                |
| CC                                                                                                                               | 8.48 (0.76)                   | 7.88 (0.74)                   | 8.03 (0.94)                   | 8.22 (0.81)                   | 8.15 (0.84)                    |
| CT                                                                                                                               | 8.41 (0.71)                   | 7.89 (0.86)                   | 8.30 (0.89)                   | 8.17 (0.79)                   | 8.18 (0.83)                    |
| TT                                                                                                                               | 8.52 (0.53)                   | 7.75 (1.27)                   | 8.16 (0.94)                   | 8.09 (0.85)                   | 8.10 (0.92)                    |
| Results of ANCOVA <sup>1</sup>                                                                                                   |                               |                               |                               |                               |                                |
| Adjusted change in<br>HbA <sub>1c</sub> from baseline,<br>mean % (95% CI)                                                        |                               |                               |                               |                               |                                |
| Placebo                                                                                                                          | -0.37 (-0.95, 0.21)           | 0.15 (-0.06, 0.36)            | 0.34 (-0.11, 0.78)            | -0.24 (-0.63, 0.16)           | -0.11 (-0.38, 0.16)            |
| Treated by genotype                                                                                                              |                               |                               |                               |                               |                                |
| CC                                                                                                                               | -0.91 (-1.52, -0.30)          | -0.62 (-0.85, -0.39)          | -0.58 (-0.97, -0.20)          | -0.94 (-1.33, -0.55)          | -0.82 (-1.09, -0.56)           |
| CT                                                                                                                               | -0.92 (-1.50, -0.34)          | -0.56 (-0.79, -0.33)          | -0.50 (-0.94, -0.07)          | -0.88 (-1.28, -0.48)          | -0.77 (-1.04, -0.50)           |
| TT                                                                                                                               | -0.91 (-1.66, -0.16)          | -0.12 (-0.59, 0.36)           | -0.30 (-0.91, 0.32)           | -0.70 (-1.16, -0.25)          | -0.57 (-0.89, -0.24)           |
| Difference in change in<br>HbA <sub>1c</sub> from baseline:<br>treated CC vs. TT,<br>adjusted mean % (95%<br>CI); <i>P</i> value | -0.00 (-0.57, 0.57)<br>0.9915 | -0.51 (-1.03, 0.02)<br>0.0577 | -0.28 (-0.82, 0.25)<br>0.2984 | -0.24 (-0.53, 0.05)<br>0.1041 | -0.26 (-0.48, -0.04)<br>0.0182 |

---

<sup>1</sup>NCT00641043, NCT00621140, NCT00601250: ANCOVA model includes continuous baseline HbA<sub>1c</sub>, number of prior oral glucose-lowering drugs (OAD), race, treatment-genotype group; NCT00602472: ANCOVA model includes continuous baseline HbA<sub>1c</sub>, race, treatment-genotype group; pooled analysis of all studies: ANCOVA model includes continuous baseline HbA<sub>1c</sub>, wash-out-period for prior OADs (yes/no), race, study, treatment-genotype group.
