# Supplementary material for: Influence of TCF7L2 gene variants on the therapeutic response to the dipeptidylpeptidase-4 inhibitor linagliptin
Source: Springer Nature journal article supplement (doi:10.1007/s00125-014-3276-y), 2014-06-06

**ESM Fig. 1** Box plot for change from baseline of 2h-PPG at week 24. Whiskers indicate sample minimum and maximum and dots represent mean values

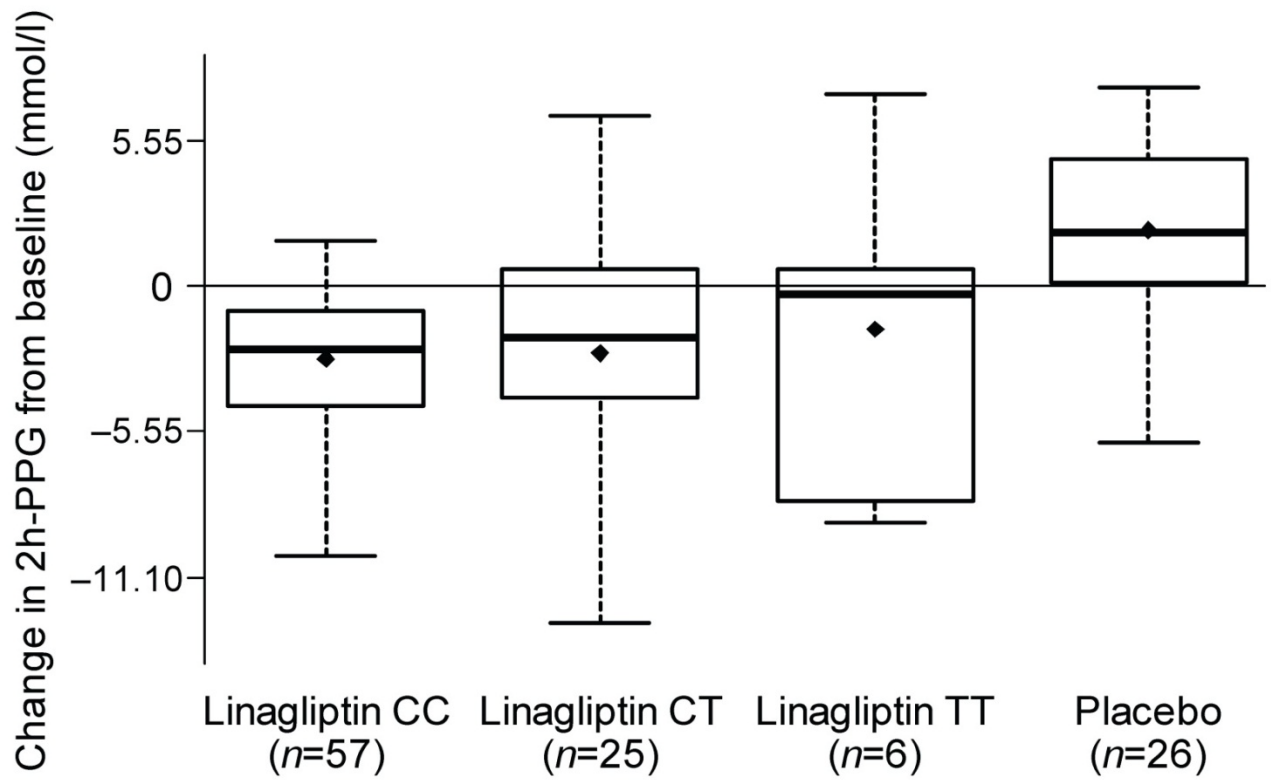

Supplement: MOESM2 [file 8092332]
